# Supplementary material for: Factors regulating growth pattern and condition factor of an amphibious fish Periophthalmus gracilis living in the Mekong Delta
Source: PeerJ. 2022 Mar 4;10:e13060. doi: 10.7717/peerj.13060 (PMC8900610; doi:10.7717/peerj.13060)
Supplement: Supplemental Information 1 [file peerj-10-13060-s001.xlsx]

## Sheet: Sheet1
No.	Fish weight	Fish total length	Gender (0: Female and 1: Male)	Fish size (1: Immature fish and 2: Mature fish)	Season (1: Dry; 2: Wet)	Site	Month (4/2020-3/2021)
1	0.8	4.6	1	1	1	DHBL	1
2	1.1	5.4	0	1	1	DHBL	1
3	1.1	5.3	1	1	1	DHBL	1
4	1.2	5.5	0	1	1	DHBL	1
5	1.02	5.1	0	1	1	DHBL	1
6	0.81	4.8	1	1	1	DHBL	1
7	1.12	5.6	1	1	1	DHBL	1
8	0.77	4.7	1	1	1	DHBL	1
9	0.33	3.6	1	1	1	DHTV	1
10	1.35	5.5	0	2	1	DHTV	1
11	0.81	4.8	1	2	1	DHTV	1
12	1.14	5.6	1	2	1	DHTV	1
13	0.77	4.7	1	2	1	DHTV	1
14	0.78	5	0	2	1	DHTV	1
15	0.72	4.8	0	1	1	DHTV	1
16	0.7	4.6	1	1	1	DHTV	1
17	0.98	5.3	1	2	1	DHTV	1
18	0.52	4.1	0	1	1	DHTV	1
19	0.8	4.7	1	1	1	DDCM	1
20	0.44	3.7	1	1	1	DDCM	1
21	1.24	5.4	0	2	1	DDCM	1
22	1.05	5.2	0	2	1	DDCM	1
23	0.86	4.9	1	1	1	DDCM	1
24	1.13	5.7	1	1	1	DDCM	1
25	0.82	4.8	1	1	1	DDCM	1
26	0.83	5.1	0	1	1	DDCM	1
27	0.77	4.9	0	1	1	DDCM	1
28	0.75	4.7	1	1	1	DDCM	1
29	0.95	5.4	1	1	1	DDCM	1
30	1.25	5.6	1	1	1	TDST	1
31	1.35	5.8	0	1	1	TDST	1
32	1.64	5.6	0	1	1	TDST	1
33	0.96	5.1	1	1	1	TDST	1
34	1.25	5.4	0	2	1	TDST	1
35	0.92	5	1	1	1	TDST	1
36	0.78	5	0	1	1	DHBL	2
37	0.72	4.8	0	1	1	DHBL	2
38	0.7	4.6	1	1	1	DHBL	2
39	0.86	5.3	1	1	1	DHBL	2
40	0.52	4.1	0	1	1	DHBL	2
41	0.48	4.1	1	1	1	DHBL	2
42	0.59	4.3	1	1	1	DHBL	2
43	0.75	4.7	1	2	1	DHTV	2
44	0.93	5.1	0	2	1	DHTV	2
45	0.57	4.2	1	1	1	DHTV	2
46	0.53	4.2	0	1	1	DHTV	2
47	0.64	4.4	0	1	1	DHTV	2
48	0.41	3.9	1	1	1	DHTV	2
49	0.38	3.7	1	1	1	DHTV	2
50	1.08	5.2	1	2	1	DHTV	2
51	0.86	4.9	0	1	1	DHTV	2
52	1.15	5.3	0	2	1	DHTV	2
53	0.82	4.8	1	2	1	DHTV	2
54	0.83	5.1	1	2	1	DHTV	2
55	0.57	4.2	0	1	1	DDCM	2
56	0.53	4.2	1	1	1	DDCM	2
57	0.74	4.4	1	1	1	DDCM	2
58	0.41	3.9	0	1	1	DDCM	2
59	0.38	3.7	1	1	1	DDCM	2
60	1.07	5.2	0	2	1	DDCM	2
61	0.86	4.9	1	1	1	DDCM	2
62	1.15	5.7	1	1	1	DDCM	2
63	0.82	4.8	1	1	1	DDCM	2
64	0.93	5.3	0	1	1	TDST	2
65	0.85	4.9	1	1	1	TDST	2
66	0.73	5.6	1	1	1	TDST	2
67	0.71	4.4	1	1	1	TDST	2
68	0.74	4.6	1	1	1	TDST	2
69	0.91	4.7	0	1	1	DHBL	3
70	0.26	3.3	1	1	1	DHBL	3
71	1.13	5.2	0	1	1	DHBL	3
72	0.96	4.8	0	1	1	DHBL	3
73	0.58	4	1	1	1	DHBL	3
74	0.62	4.1	1	1	1	DHBL	3
75	0.44	3.7	1	1	1	DHBL	3
76	0.27	3.3	1	1	1	DHBL	3
77	1.03	5	1	1	1	DHBL	3
78	0.68	4.5	0	1	1	DHBL	3
79	1.28	5.3	1	2	1	DHTV	3
80	0.47	3.7	1	1	1	DHTV	3
81	0.43	3.7	0	1	1	DHTV	3
82	0.82	4.3	1	1	1	DHTV	3
83	0.41	3.5	0	1	1	DHTV	3
84	0.59	3.9	1	1	1	DHTV	3
85	0.51	4.7	1	1	1	DHTV	3
86	0.47	3.6	0	1	1	DHTV	3
87	1.19	4.7	0	1	1	DHTV	3
88	1.13	5.2	0	2	1	DHTV	3
89	0.96	4.8	0	1	1	DHTV	3
90	0.31	3.4	1	1	1	DHTV	3
91	0.6	4.1	0	1	1	DHTV	3
92	0.39	3.7	1	1	1	DHTV	3
93	0.78	4.8	0	1	1	DHTV	3
94	0.72	4.6	0	1	1	DHTV	3
95	0.78	4.8	0	1	1	DDCM	3
96	0.61	4.3	1	1	1	DDCM	3
97	0.51	3.9	1	1	1	DDCM	3
98	0.45	3.9	1	1	1	DDCM	3
99	0.66	4.4	1	1	1	DDCM	3
100	0.32	3.3	0	1	1	DDCM	3
101	0.55	4	0	1	1	DDCM	3
102	0.66	4	0	1	1	DDCM	3
103	1.19	4.7	0	1	1	DDCM	3
104	0.81	4.6	1	1	1	DDCM	3
105	1.01	4.9	0	1	1	DDCM	3
106	0.59	4.1	1	1	1	TDST	3
107	0.54	3.8	1	1	1	TDST	3
108	0.74	4.4	1	1	1	TDST	3
109	0.86	4.7	1	1	1	TDST	3
110	0.77	4.4	1	1	1	TDST	3
111	0.7	4.2	1	1	1	TDST	3
112	0.63	4.1	1	1	1	TDST	3
113	0.49	3.9	0	1	1	TDST	3
114	0.37	3.2	1	1	1	TDST	3
115	0.46	3.7	1	1	1	TDST	3
116	1.66	5.5	0	1	1	TDST	3
117	0.87	5	0	1	1	TDST	3
118	0.75	4.5	1	1	1	DHBL	4
119	1.05	5.3	0	1	1	DHBL	4
120	1.05	5.2	1	1	1	DHBL	4
121	1.15	5.4	0	1	1	DHBL	4
122	0.97	5	0	1	1	DHBL	4
123	0.76	4.7	1	1	1	DHBL	4
124	1.05	5.5	1	1	1	DHBL	4
125	0.72	4.6	1	1	1	DHBL	4
126	0.73	4.9	0	1	1	DHBL	4
127	0.67	4.7	0	1	1	DHBL	4
128	0.65	4.5	1	1	1	DHBL	4
129	0.53	5.2	1	1	1	DHBL	4
130	1.36	5.5	1	2	1	DHTV	4
131	1	4.9	0	1	1	DHTV	4
132	0.59	4.3	0	1	1	DHTV	4
133	0.7	4.3	0	1	1	DHTV	4
134	1.29	5.3	0	2	1	DHTV	4
135	0.5	3.9	1	1	1	DHTV	4
136	0.5	3.8	0	1	1	DHTV	4
137	0.73	4.3	0	1	1	DHTV	4
138	0.57	4.1	1	1	1	DHTV	4
139	1.2	5.1	0	2	1	DHTV	4
140	0.85	4.7	1	1	1	DDCM	4
141	1.15	5.2	0	2	1	DDCM	4
142	1.15	5.4	1	1	1	DDCM	4
143	1.25	5.4	0	2	1	DDCM	4
144	1.07	5.2	0	2	1	DDCM	4
145	0.86	4.8	1	1	1	TDST	4
146	0.96	5	0	1	1	TDST	4
147	0.83	4.6	1	1	1	TDST	4
148	0.79	4.7	0	1	1	TDST	4
149	0.78	4.3	0	1	1	TDST	4
150	0.81	4.9	1	1	1	TDST	4
151	1.24	5.4	1	1	1	TDST	4
152	0.47	4	0	1	1	DHBL	5
153	0.43	4	1	1	1	DHBL	5
154	0.54	4.2	1	1	1	DHBL	5
155	0.31	3.7	0	1	1	DHBL	5
156	0.28	3.5	1	1	1	DHBL	5
157	0.97	5	0	1	1	DHBL	5
158	0.76	4.7	1	1	1	DHBL	5
159	1.05	5.5	1	1	1	DHBL	5
160	0.72	4.6	1	1	1	DHBL	5
161	0.73	4.9	0	1	1	DHBL	5
162	0.67	4.7	0	1	1	DHBL	5
163	0.65	4.5	1	1	1	DHBL	5
164	0.53	5.2	1	1	1	DHBL	5
165	0.47	4	0	1	1	DHBL	5
166	1.31	5.2	0	2	1	DHTV	5
167	0.95	4.8	0	1	1	DHTV	5
168	0.54	4.2	0	1	1	DHTV	5
169	0.65	4.2	0	1	1	DHTV	5
170	1.24	5.2	0	2	1	DHTV	5
171	0.45	3.8	0	1	1	DHTV	5
172	0.45	3.7	0	1	1	DHTV	5
173	0.68	4.2	0	1	1	DHTV	5
174	0.52	4	1	1	1	DHTV	5
175	1.15	5.2	0	2	1	DHTV	5
176	1.08	5.1	0	2	1	DHTV	5
177	0.46	3.9	0	1	1	DHTV	5
178	0.62	3.9	1	1	1	DHTV	5
179	0.34	3.5	0	1	1	DHTV	5
180	0.34	3.5	1	1	1	DHTV	5
181	0.86	4.9	1	1	1	DDCM	5
182	1.16	5.7	1	1	1	DDCM	5
183	0.82	4.8	1	1	1	DDCM	5
184	0.83	5.1	0	1	1	DDCM	5
185	0.77	4.9	0	1	1	DDCM	5
186	0.75	4.7	1	1	1	DDCM	5
187	1.03	5.4	1	1	1	DDCM	5
188	0.57	4.2	0	1	1	DDCM	5
189	0.62	4.2	0	1	1	TDST	5
190	0.73	4.6	1	1	1	TDST	5
191	0.73	4.4	1	1	1	TDST	5
192	0.57	4	1	1	1	TDST	5
193	0.54	3.9	0	1	1	TDST	5
194	0.49	3.9	1	1	1	TDST	5
195	0.51	4	1	1	1	TDST	5
196	0.79	4.4	1	1	1	TDST	5
197	0.64	4.9	0	1	1	TDST	5
198	0.8	4.6	1	1	2	DHBL	6
199	1.1	5.4	0	1	2	DHBL	6
200	1.1	5.3	1	1	2	DHBL	6
201	1.2	5.5	0	1	2	DHBL	6
202	1.02	5.1	0	1	2	DHBL	6
203	0.81	4.8	1	1	2	DHBL	6
204	1.11	5.6	1	1	2	DHBL	6
205	0.77	4.7	1	1	2	DHBL	6
206	0.78	5	0	1	2	DHBL	6
207	0.72	4.8	0	1	2	DHBL	6
208	1.26	4.9	0	1	2	DHTV	6
209	1.26	5.4	0	2	2	DHTV	6
210	1.06	4.6	0	1	2	DHTV	6
211	1.22	4.9	0	1	2	DHTV	6
212	1.18	5	0	2	2	DHTV	6
213	0.87	4.6	1	1	2	DHTV	6
214	1.09	4.9	0	1	2	DHTV	6
215	1.17	5.2	0	2	2	DHTV	6
216	1.09	4.4	0	1	2	DHTV	6
217	0.53	4.2	1	1	2	DDCM	6
218	0.74	4.4	1	1	2	DDCM	6
219	0.41	3.9	0	1	2	DDCM	6
220	0.38	3.7	1	1	2	DDCM	6
221	1.05	5.2	0	2	2	DDCM	6
222	0.86	4.9	1	1	2	DDCM	6
223	1.14	5.7	1	1	2	DDCM	6
224	0.82	4.8	1	1	2	DDCM	6
225	0.83	5.1	0	1	2	DDCM	6
226	0.77	4.9	0	1	2	DDCM	6
227	0.44	3.5	1	1	2	TDST	6
228	0.54	4	0	1	2	TDST	6
229	0.71	4.4	1	1	2	TDST	6
230	0.58	4.3	0	1	2	TDST	6
231	0.47	3.8	0	1	2	TDST	6
232	1	5	1	1	2	TDST	6
233	1.3	5.8	0	1	2	TDST	6
234	1.12	5.7	0	1	2	TDST	6
235	0.7	4.6	1	1	2	DHBL	7
236	0.78	5.3	1	1	2	DHBL	7
237	0.52	4.1	0	1	2	DHBL	7
238	0.48	4.1	1	1	2	DHBL	7
239	0.59	4.3	1	1	2	DHBL	7
240	0.36	3.8	0	1	2	DHBL	7
241	0.33	3.6	1	1	2	DHBL	7
242	1.02	5.1	0	1	2	DHBL	7
243	0.81	4.8	1	1	2	DHBL	7
244	1.1	5.6	1	1	2	DHBL	7
245	0.77	4.7	1	1	2	DHBL	7
246	0.78	5	0	1	2	DHBL	7
247	0.75	4.6	1	1	2	DHTV	7
248	0.39	3.6	1	1	2	DHTV	7
249	1.4	5.9	0	2	2	DHTV	7
250	1.24	4.9	0	1	2	DHTV	7
251	1.03	4.7	0	1	2	DHTV	7
252	0.8	4.4	0	1	2	DHTV	7
253	0.68	4.1	1	1	2	DHTV	7
254	0.44	3.7	0	1	2	DHTV	7
255	0.69	4.3	1	1	2	DHTV	7
256	0.62	3.9	0	1	2	DHTV	7
257	0.82	4.3	0	1	2	DHTV	7
258	0.63	4.1	1	1	2	DHTV	7
259	0.75	4.7	1	1	2	DDCM	7
260	0.94	5.4	1	1	2	DDCM	7
261	1.26	4.9	0	1	2	DDCM	7
262	1.26	5.2	0	2	2	DDCM	7
263	1.06	4.6	0	1	2	DDCM	7
264	1.22	4.9	0	1	2	DDCM	7
265	1.18	5	0	1	2	DDCM	7
266	0.87	4.6	1	1	2	DDCM	7
267	1.09	4.9	0	1	2	DDCM	7
268	1.17	5.2	0	2	2	DDCM	7
269	1.09	4.4	0	1	2	DDCM	7
270	0.92	5.2	1	1	2	TDST	7
271	0.9	5	0	1	2	TDST	7
272	0.95	5.7	0	1	2	TDST	7
273	0.72	4.5	0	1	2	TDST	7
274	0.68	4.5	1	1	2	TDST	7
275	0.79	4.7	1	1	2	TDST	7
276	0.92	5	1	1	2	TDST	7
277	0.93	5.3	0	1	2	TDST	7
278	0.72	4.8	0	1	2	DHBL	8
279	0.7	4.6	1	1	2	DHBL	8
280	0.88	5.3	1	1	2	DHBL	8
281	0.52	4.1	0	1	2	DHBL	8
282	0.79	4.5	1	1	2	DHBL	8
283	0.9	4.8	1	1	2	DHBL	8
284	0.72	4.5	1	1	2	DHBL	8
285	0.64	4.3	1	1	2	DHBL	8
286	0.49	3.6	0	1	2	DHBL	8
287	0.62	4.3	1	1	2	DHBL	8
288	0.77	4.6	1	1	2	DHBL	8
289	0.71	4.5	1	1	2	DHBL	8
290	0.84	4.7	0	1	2	DHBL	8
291	0.71	4.5	1	1	2	DHBL	8
292	0.71	4.5	1	1	2	DHBL	8
293	0.76	4.4	1	1	2	DHTV	8
294	0.73	4.2	0	1	2	DHTV	8
295	0.8	4.3	1	1	2	DHTV	8
296	0.64	4.1	0	1	2	DHTV	8
297	0.61	4.1	0	1	2	DHTV	8
298	0.57	4	0	1	2	DHTV	8
299	0.58	4	1	1	2	DHTV	8
300	0.66	4	0	1	2	DHTV	8
301	0.55	4	1	1	2	DHTV	8
302	0.63	4.2	0	1	2	DHTV	8
303	0.79	4.4	1	1	2	DHTV	8
304	0.56	3.8	1	1	2	DHTV	8
305	0.54	3.9	1	1	2	DHTV	8
306	0.75	4.6	1	1	2	DDCM	8
307	0.39	3.6	1	1	2	DDCM	8
308	1.56	5.9	0	2	2	DDCM	8
309	1.24	4.9	0	1	2	DDCM	8
310	1.03	4.7	0	1	2	DDCM	8
311	0.76	4.7	1	1	2	DDCM	8
312	0.9	4.9	0	1	2	DDCM	8
313	0.65	4.6	1	1	2	DDCM	8
314	0.54	4.2	1	1	2	DDCM	8
315	0.48	4.1	1	1	2	DDCM	8
316	0.77	4.5	0	1	2	DDCM	8
317	0.52	3.9	1	1	2	DDCM	8
318	0.51	4.2	1	1	2	DDCM	8
319	0.87	5.1	0	1	2	TDST	8
320	0.85	4.9	1	1	2	TDST	8
321	0.73	5.6	1	1	2	TDST	8
322	0.77	4.4	0	1	2	TDST	8
323	1.05	5.1	1	1	2	TDST	8
324	0.87	4.8	1	1	2	TDST	8
325	0.79	4.6	1	1	2	TDST	8
326	0.64	3.9	0	1	2	TDST	8
327	0.77	4.6	0	1	2	TDST	8
328	0.92	4.9	1	1	2	TDST	8
329	0.74	4.4	1	1	2	DHBL	9
330	0.85	4.7	1	1	2	DHBL	9
331	0.67	4.4	1	1	2	DHBL	9
332	0.59	4.2	1	1	2	DHBL	9
333	0.44	3.6	0	1	2	DHBL	9
334	0.57	4.2	1	1	2	DHBL	9
335	0.72	4.5	1	1	2	DHBL	9
336	0.66	4.4	1	1	2	DHBL	9
337	0.79	4.6	0	1	2	DHBL	9
338	0.77	4.4	1	1	2	DHBL	9
339	1.36	5.5	0	2	2	DHTV	9
340	1	4.9	0	1	2	DHTV	9
341	0.59	4.3	0	1	2	DHTV	9
342	0.7	4.3	0	1	2	DHTV	9
343	1.29	5.5	0	2	2	DHTV	9
344	0.5	3.9	0	1	2	DHTV	9
345	0.5	3.8	0	1	2	DHTV	9
346	0.73	4.3	0	1	2	DHTV	9
347	0.57	4.1	1	1	2	DHTV	9
348	1.2	5.1	0	2	2	DHTV	9
349	1.13	5.1	0	2	2	DHTV	9
350	0.51	4	0	1	2	DHTV	9
351	0.38	3.7	0	1	2	DDCM	9
352	0.34	3.7	1	1	2	DDCM	9
353	0.42	3.6	1	1	2	DDCM	9
354	0.45	3.9	1	1	2	DDCM	9
355	0.15	2.9	1	1	2	DDCM	9
356	0.13	3.1	1	1	2	DDCM	9
357	1.31	5.2	0	2	2	DDCM	9
358	0.95	4.8	0	1	2	DDCM	9
359	0.54	4.2	0	1	2	DDCM	9
360	0.65	4.2	0	1	2	DDCM	9
361	1.24	5.2	0	2	2	DDCM	9
362	0.45	3.8	0	1	2	DDCM	9
363	0.82	4.7	1	1	2	TDST	9
364	0.74	4.5	1	1	2	TDST	9
365	0.92	5.2	0	1	2	TDST	9
366	0.72	4.5	1	1	2	TDST	9
367	0.87	4.8	0	1	2	TDST	9
368	0.81	4.7	1	1	2	TDST	9
369	0.94	4.9	0	1	2	TDST	9
370	0.81	4.7	1	1	2	TDST	9
371	0.7	4.4	1	1	2	DHBL	10
372	0.76	4.6	1	1	2	DHBL	10
373	0.63	4.2	1	1	2	DHBL	10
374	0.59	4.3	1	1	2	DHBL	10
375	0.58	3.9	1	1	2	DHBL	10
376	0.61	4.5	1	1	2	DHBL	10
377	1.04	5	0	1	2	DHBL	10
378	0.84	4.8	1	1	2	DHBL	10
379	0.52	4.1	1	1	2	DHBL	10
380	0.51	4	1	1	2	DHBL	10
381	0.72	4.5	1	1	2	DHBL	10
382	0.47	3.9	1	1	2	DHBL	10
383	0.67	4	1	1	2	DHTV	10
384	0.39	3.6	0	1	2	DHTV	10
385	0.39	3.6	1	1	2	DHTV	10
386	1.31	5	0	2	2	DHTV	10
387	1.31	5.3	0	2	2	DHTV	10
388	1.11	4.7	0	1	2	DHTV	10
389	1.27	5.4	0	2	2	DHTV	10
390	1.23	5.1	0	2	2	DHTV	10
391	0.92	4.7	1	2	2	DHTV	10
392	1.14	5	0	2	2	DHTV	10
393	1.22	5.3	0	2	2	DHTV	10
394	1.14	4.5	0	1	2	DHTV	10
395	0.8	4.7	1	2	2	DHTV	10
396	0.44	3.7	1	1	2	DHTV	10
397	0.45	3.7	0	1	2	DDCM	10
398	0.68	4.2	0	1	2	DDCM	10
399	0.52	4	1	1	2	DDCM	10
400	1.15	5	0	1	2	DDCM	10
401	1.08	5	0	1	2	DDCM	10
402	0.46	3.9	0	1	2	DDCM	10
403	0.62	3.9	1	1	2	DDCM	10
404	0.34	3.5	0	1	2	DDCM	10
405	0.34	3.5	1	1	2	DDCM	10
406	0.81	4.7	0	1	2	TDST	10
407	0.91	4.9	1	1	2	TDST	10
408	0.78	4.5	1	1	2	TDST	10
409	0.74	4.6	1	1	2	TDST	10
410	0.73	4.2	1	1	2	TDST	10
411	0.76	4.8	1	1	2	TDST	10
412	0.99	5.1	0	1	2	TDST	10
413	0.73	4.4	1	1	2	TDST	10
414	0.47	4.2	1	1	2	DHBL	11
415	0.45	3.9	0	1	2	DHBL	11
416	0.44	3.8	0	1	2	DHBL	11
417	0.37	3.8	0	1	2	DHBL	11
418	0.51	3.8	0	1	2	DHBL	11
419	0.42	3.8	1	1	2	DHBL	11
420	0.53	4.2	1	1	2	DHBL	11
421	0.43	4	1	1	2	DHBL	11
422	0.37	3.6	1	1	2	DHBL	11
423	0.34	3.5	1	1	2	DHBL	11
424	0.29	3.5	1	1	2	DHBL	11
425	0.8	4.6	1	1	2	DHTV	11
426	1.1	5.4	0	2	2	DHTV	11
427	1.1	5.3	1	2	2	DHTV	11
428	1.2	5.3	0	2	2	DHTV	11
429	1.02	5.1	0	2	2	DHTV	11
430	0.81	4.8	1	2	2	DHTV	11
431	1.13	5.3	1	2	2	DHTV	11
432	0.77	4.7	1	2	2	DHTV	11
433	1.36	5.6	0	2	2	DDCM	11
434	1	4.9	0	1	2	DDCM	11
435	0.59	4.3	0	1	2	DDCM	11
436	0.7	4.3	0	1	2	DDCM	11
437	1.29	5.3	0	2	2	DDCM	11
438	0.5	3.9	0	1	2	DDCM	11
439	0.5	3.8	0	1	2	DDCM	11
440	0.73	4.3	0	1	2	DDCM	11
441	0.57	4.1	1	1	2	DDCM	11
442	1.2	5.1	0	1	2	DDCM	11
443	1.13	5.1	0	1	2	DDCM	11
444	0.52	4.1	0	1	2	TDST	11
445	0.66	4.1	0	1	2	TDST	11
446	0.57	4.1	1	1	2	TDST	11
447	0.68	4.5	1	1	2	TDST	11
448	0.58	4.3	1	1	2	TDST	11
449	0.52	3.9	1	1	2	TDST	11
450	0.49	3.8	1	1	2	TDST	11
451	0.44	3.8	0	1	2	TDST	11
452	0.31	3.6	0	1	2	DHBL	12
453	0.39	4	0	1	2	DHBL	12
454	0.44	4.5	1	1	2	DHBL	12
455	0.24	3.1	1	1	2	DHBL	12
456	0.34	3.6	1	1	2	DHBL	12
457	0.41	4	0	1	2	DHBL	12
458	0.38	3.9	1	1	2	DHBL	12
459	0.27	3.4	0	1	2	DHBL	12
460	0.78	5	0	2	2	DHTV	12
461	0.72	4.8	0	1	2	DHTV	12
462	0.7	4.6	1	1	2	DHTV	12
463	0.92	5.3	1	2	2	DHTV	12
464	0.52	4.1	0	1	2	DHTV	12
465	0.48	4.1	1	1	2	DHTV	12
466	0.59	4.3	1	1	2	DHTV	12
467	0.36	3.8	0	1	2	DHTV	12
468	0.51	4	0	1	2	DDCM	12
469	0.67	4	1	1	2	DDCM	12
470	0.39	3.6	0	1	2	DDCM	12
471	0.39	3.6	1	1	2	DDCM	12
472	1.31	5	0	1	2	DDCM	12
473	1.31	5.3	0	2	2	DDCM	12
474	1.11	4.7	0	1	2	DDCM	12
475	1.27	5	0	1	2	DDCM	12
476	1.23	5.1	0	1	2	DDCM	12
477	0.92	4.7	1	1	2	DDCM	12
478	1.14	5	0	1	2	DDCM	12
479	1.22	5.3	0	2	2	DDCM	12
480	1.14	4.5	0	1	2	DDCM	12
481	0.46	3.9	0	1	2	TDST	12
482	0.54	4.3	0	1	2	TDST	12
483	0.64	4.8	1	1	2	TDST	12
484	0.39	3.4	1	1	2	TDST	12
485	0.49	3.9	1	1	2	TDST	12
486	0.56	4.3	0	1	2	TDST	12
